# Supplementary material for: Association of prevalent vaginal microbiome of mother with occurrence of type I diabetes in child
Source: PubMed Central journal article supplement (PMC6353987; doi:10.1038/s41598-018-37467-w), 2019-01-30
Supplement: 41598_2018_37467_MOESM1_ESM.pdf [file 41598_2018_37467_MOESM1_ESM.pdf]

Supplementary information

**Association of prevalent vaginal microbiome of mother with occurrence of type I diabetes in child**

Mysore V Tejesvi, Ritva Nissi, Karita Saravesi, Anna Maria Pirttilä, Annamari Markkola, Anne Talvensaari-Mattila, Anna Liisa

Ruotsalainen

**Supplementary information 1.**

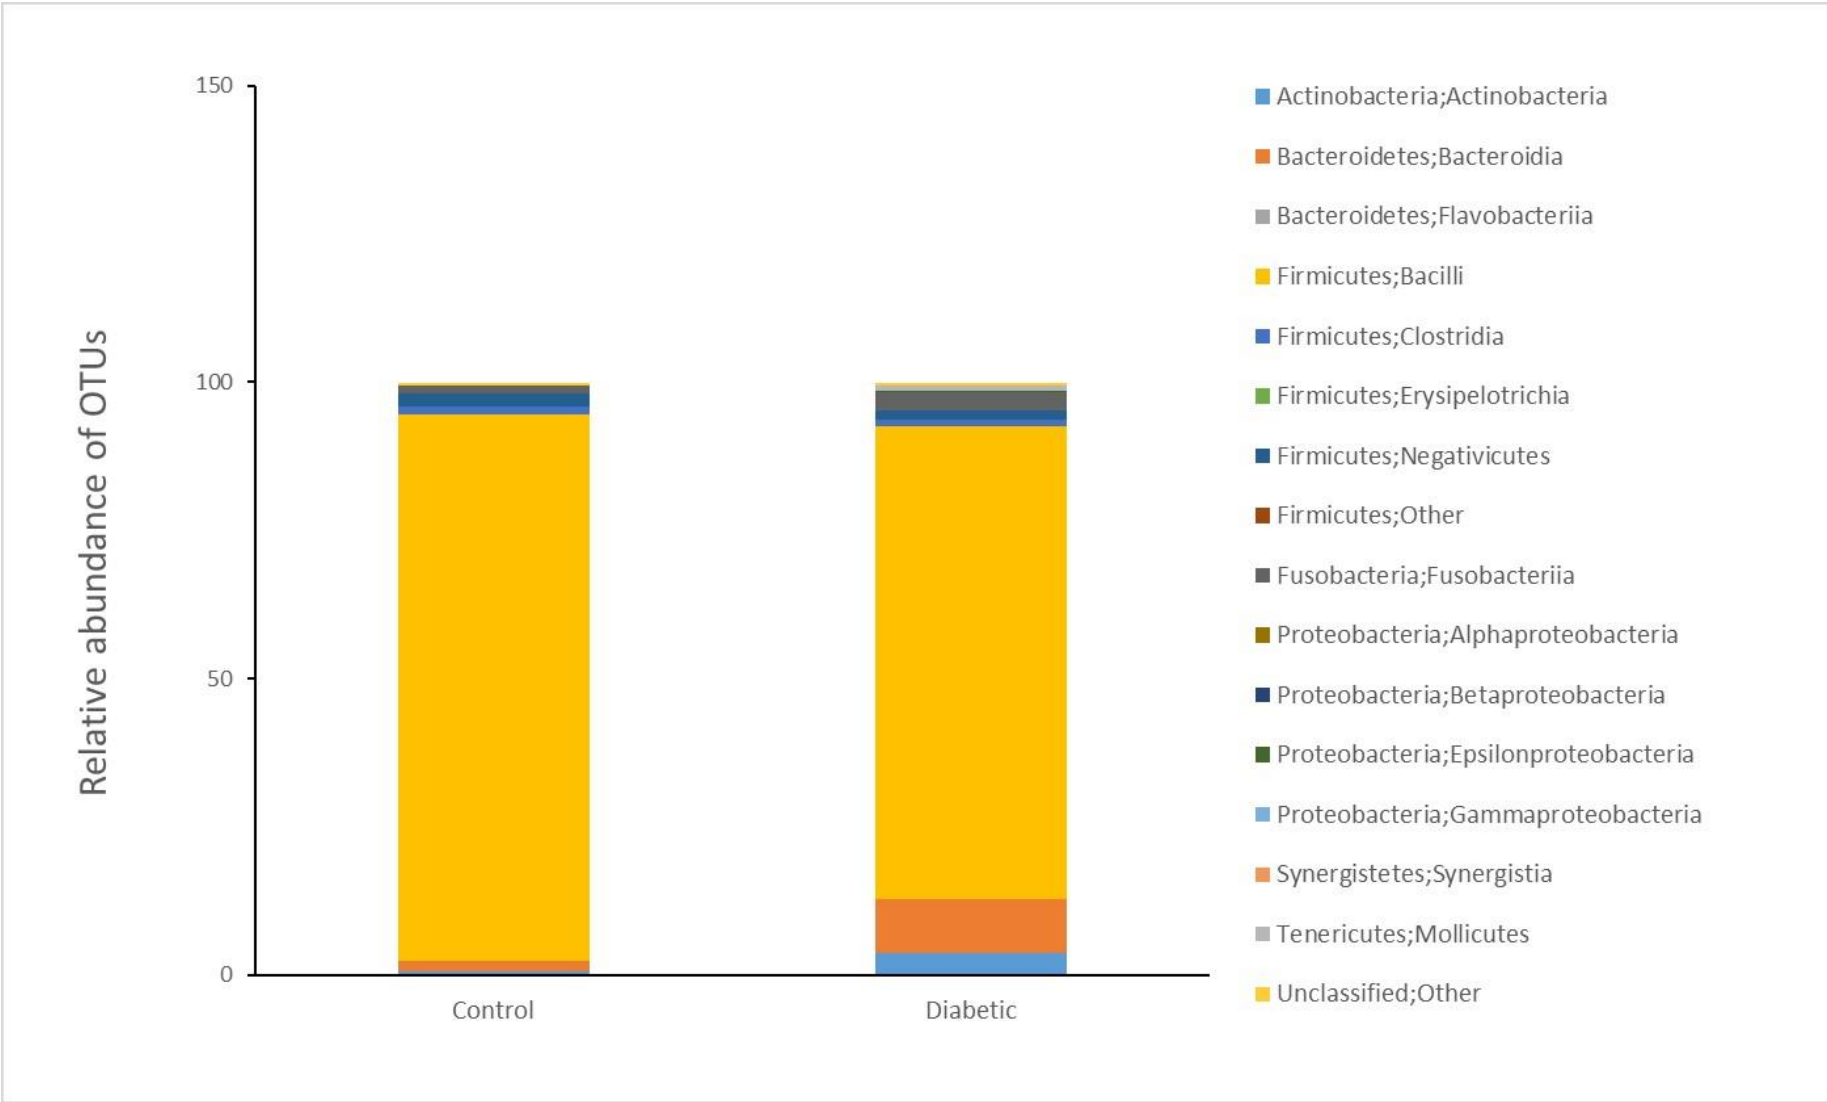

## Supplementary information 2.

R scripts, outputs and diagnostic plots of analysis of variance (ANOVA) and linear mixed effects (LME) models.

1. Analysis of the impact of swab type on Chao1, Shannon and Simpson index and OTU relative abundance by using 1-way analysis of variance (ANOVA). Explanatory factor: swab type (levels: cotton and Dacron). Testing carried out for control and diabetic groups separately.
2. Testing the impact of mother group (= diab, levels: control = no diabetic child/children, diabetic = 1 or more T1D child/children).

### 1. Impact of swab:

**Impact of swab type within the control group:**

```
> model<-aov(chao~swab)
```

```
> summary(model)
```

|           | Df | Sum Sq | Mean Sq | F value | Pr(>F) |
|-----------|----|--------|---------|---------|--------|
| swab      | 1  | 8066   | 8066    | 0.181   | 0.677  |
| Residuals | 14 | 622179 | 44441   |         |        |

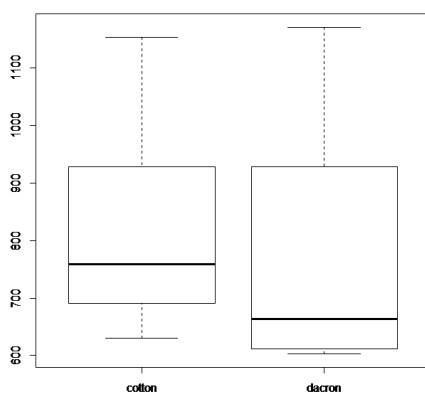

```
> model<-aov(simpson~swab)
```

```
> summary(model)
```

|           | Df | Sum Sq | Mean Sq  | F value | Pr(>F) |
|-----------|----|--------|----------|---------|--------|
| swab      | 1  | 0.0007 | 0.000711 | 0.026   | 0.875  |
| Residuals | 14 | 0.3901 | 0.027863 |         |        |

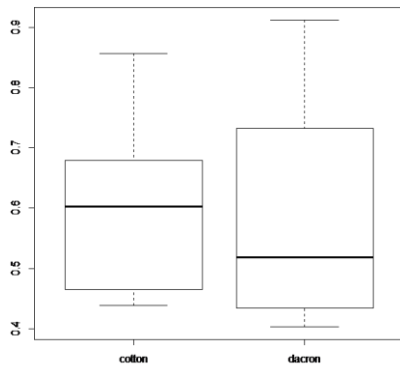

```
> model<-aov(shannon~swab)
> summary(model)
```

|           | Df | Sum Sq | Mean Sq | F value | Pr(>F) |
|-----------|----|--------|---------|---------|--------|
| swab      | 1  | 0.027  | 0.0275  | 0.026   | 0.873  |
| Residuals | 14 | 14.522 | 1.0373  |         |        |

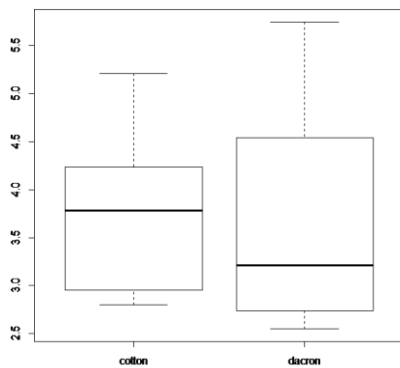

```
> model<-aov(otus~swab)
> summary(model)
```

|           | Df | Sum Sq | Mean Sq | F value | Pr(>F) |
|-----------|----|--------|---------|---------|--------|
| swab      | 1  | 420    | 420     | 0.045   | 0.835  |
| Residuals | 14 | 130976 | 9355    |         |        |

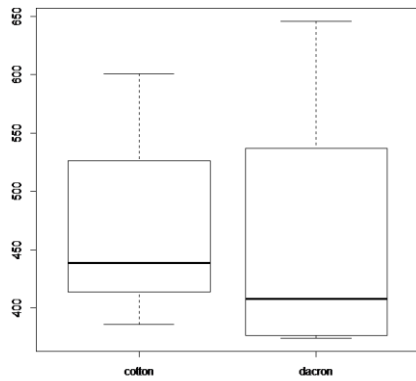

**Impact of swab type within the diabetic -group:**

Chao mary(model)

|           | Df | Sum Sq  | Mean Sq | F value | Pr(>F) |
|-----------|----|---------|---------|---------|--------|
| swab      | 1  | 773     | 773     | 0.008   | 0.93   |
| Residuals | 14 | 1370532 | 97895   |         |        |

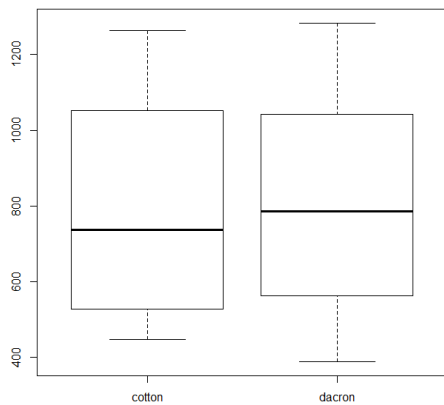

```
> model<-aov(simpson~swab)
```

```
> summary(model)
```

|           | Df | Sum Sq  | Mean Sq | F value | Pr(>F) |
|-----------|----|---------|---------|---------|--------|
| swab      | 1  | 0.01512 | 0.01512 | 0.708   | 0.414  |
| Residuals | 14 | 0.29889 | 0.02135 |         |        |

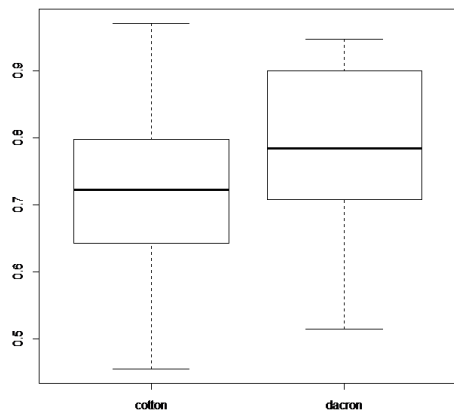

```
> model<-aov(shannon~swab)
```

```
> summary(model)
```

|           | Df | Sum Sq | Mean Sq | F value | Pr(>F) |
|-----------|----|--------|---------|---------|--------|
| swab      | 1  | 0.903  | 0.9026  | 0.579   | 0.459  |
| Residuals | 14 | 21.806 | 1.5576  |         |        |

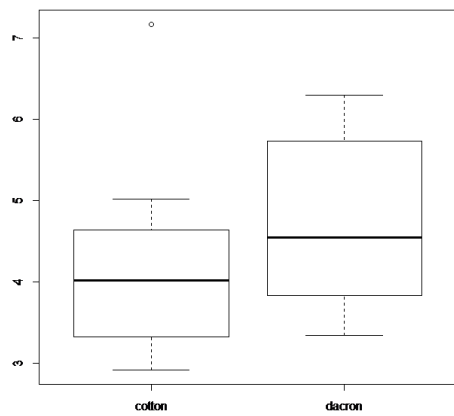

```
> model<-aov(otus~swab)
```

```
> summary(model)
```

|           | Df | Sum Sq | Mean Sq | F value | Pr(>F) |
|-----------|----|--------|---------|---------|--------|
| swab      | 1  | 743    | 743     | 0.035   | 0.855  |
| Residuals | 14 | 298727 | 21338   |         |        |

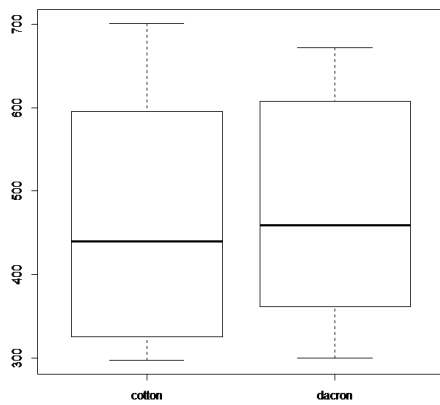

## 2. LME analysis with swab type nested within mother as random factors:

**chao1:**

```
> model<-lme(chao1~diab, random=~1|mother/swab)
```

```
> summary(model)
```

Linear mixed-effects model fit by REML

Data: NULL

| AIC      | BIC      | logLik    |
|----------|----------|-----------|
| 402.0949 | 409.1009 | -196.0475 |

Random effects:

Formula: ~1 | mother

(Intercept)

StdDev: 257.4674

Formula: ~1 | swab %in% mother

(Intercept) Residual

StdDev: 56.79128 40.285

Fixed effects: chao1 ~ diab

Value Std.Error DF t-value p-value

(Intercept) 795.0355 92.67789 16 8.578480 0.0000

diaby 5.2664 131.06633 14 0.040181 0.9685

Correlation:

(Intr)

diaby -0.707

Standardized Within-Group Residuals:

Min Q1 Med Q3 Max

-0.86810772 -0.29023812 -0.04126476 0.28423593 0.82173538

Number of Observations: 32

Number of Groups:

mother swab %in% mother

16 32

> anova(model, test="F")

numDF denDF F-value p-value

(Intercept) 1 16 148.15720 <.0001

diab 1 14 0.00161 0.9685

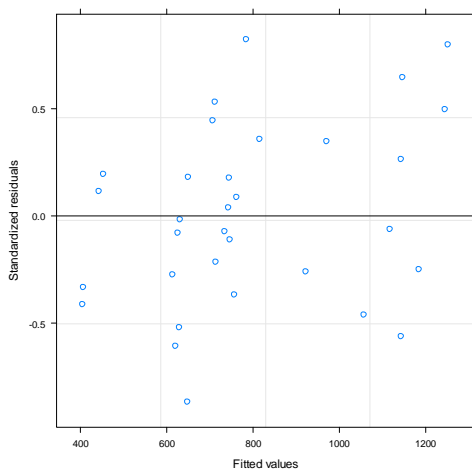



**Shannon:**

```
> model<-lme(log(shannon)~diab, random=~1 | mother/swab)
```

```
> summary(model)
```

Linear mixed-effects model fit by REML

Data: NULL

AIC BIC logLik

4.983506 11.98949 2.508247

Random effects:

Formula: ~1 | mother

(Intercept)

StdDev: 0.2358537

Formula: ~1 | swab %in% mother

(Intercept) Residual

StdDev: 0.1091228 0.05912714

Fixed effects: log(shannon) ~ diab

|  | Value | Std.Error | DF | t-value | p-value |
|--|-------|-----------|----|---------|---------|
|--|-------|-----------|----|---------|---------|

|             |           |            |    |           |        |
|-------------|-----------|------------|----|-----------|--------|
| (Intercept) | 1.2770332 | 0.08897251 | 16 | 14.353122 | 0.0000 |
|-------------|-----------|------------|----|-----------|--------|

|       |           |            |    |          |        |
|-------|-----------|------------|----|----------|--------|
| diaby | 0.1928538 | 0.12582613 | 14 | 1.532701 | 0.1476 |
|-------|-----------|------------|----|----------|--------|

Correlation:

(Intr)

diaby -0.707

Standardized Within-Group Residuals:

| Min | Q1 | Med | Q3 | Max |
|-----|----|-----|----|-----|
|-----|----|-----|----|-----|

|              |              |              |             |             |
|--------------|--------------|--------------|-------------|-------------|
| -0.840098596 | -0.177552409 | -0.004972501 | 0.142179216 | 0.822314774 |
|--------------|--------------|--------------|-------------|-------------|

Number of Observations: 32

Number of Groups:

mother swab %in% mother

16 32

```
> anova(model, test="F")
```

|  | numDF | denDF | F-value | p-value |
|--|-------|-------|---------|---------|
|--|-------|-------|---------|---------|

|             |   |    |          |        |
|-------------|---|----|----------|--------|
| (Intercept) | 1 | 16 | 476.5961 | <.0001 |
|-------------|---|----|----------|--------|

|      |   |    |        |        |
|------|---|----|--------|--------|
| diab | 1 | 14 | 2.3492 | 0.1476 |
|------|---|----|--------|--------|

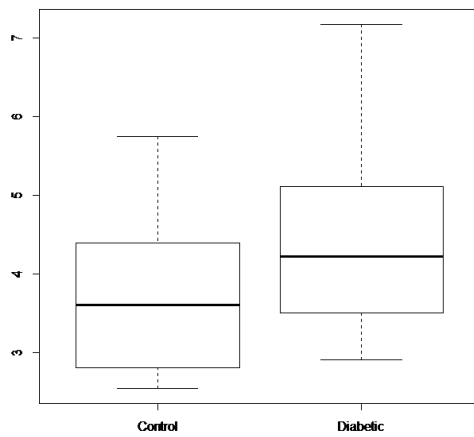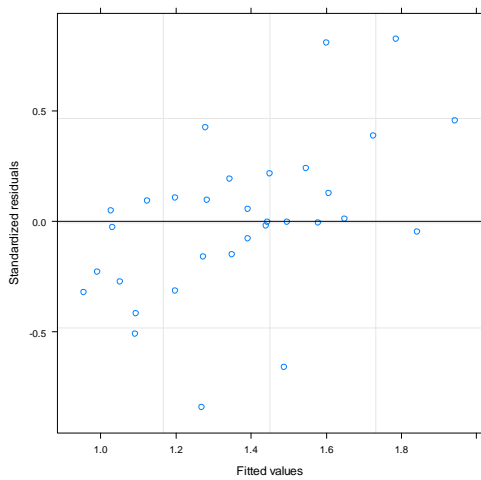

**Simpson:**

```
> model<-lme(simpson~diab, random=~1 | mother/swab)
```

```
> summary(model)
```

```
Linear mixed-effects model fit by REML
```

```
Data: NULL
```

```
    AIC    BIC logLik
```

```
-30.84982 -23.84383 20.42491
```

```
Random effects:
```

```
Formula: ~1 | mother
```

```
(Intercept)
```

```
StdDev: 0.1445313
```

```
Formula: ~1 | swab %in% mother
```

```
(Intercept) Residual
```

```
StdDev: 0.05461761 0.03184253
```

```
Fixed effects: simpson ~ diab
```

```
    Value Std.Error DF  t-value p-value
```

```
(Intercept) 0.5921033 0.0534881 16 11.069813 0.0000
```

```
diaby      0.1580268 0.0756436 14  2.089096 0.0554
```

```
Correlation:
```

```
(Intr)
```

```
diaby -0.707
```

```
Standardized Within-Group Residuals:
```

```
    Min    Q1    Med    Q3    Max
```

```
-0.878460163 -0.205815669 0.006344226 0.164438159 0.898140447
```

```
Number of Observations: 32
```

```
Number of Groups:
```

```
    mother swab %in% mother
```

```
    16     32
```

```
> anova(model, test="F")
```

|             | numDF | denDF | F-value   | p-value |
|-------------|-------|-------|-----------|---------|
| (Intercept) | 1     | 16    | 314.85578 | <.0001  |
| diab        | 1     | 14    | 4.36432   | 0.0554  |

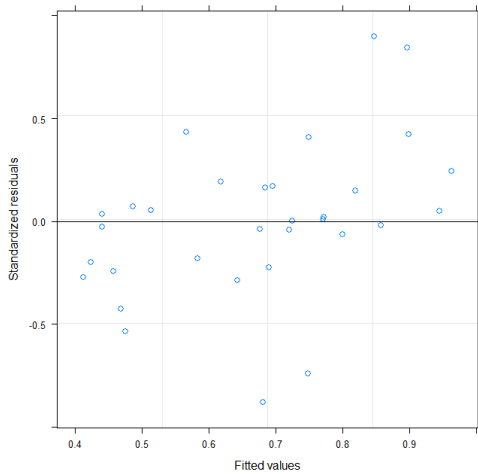

### OTUs:

```
> model<-lme(observed_otus~diab, random=~1|mother/swab)
```

```
> summary(model)
```

Linear mixed-effects model fit by REML

Data: NULL

| AIC | BIC | logLik |
|-----|-----|--------|
|-----|-----|--------|

|          |          |           |
|----------|----------|-----------|
| 351.3529 | 358.3589 | -170.6765 |
|----------|----------|-----------|

Random effects:

Formula: ~1 | mother

(Intercept)

StdDev: 120.6659

Formula: ~1 | swab %in% mother

(Intercept) Residual

StdDev: 22.15855 16.78072

Fixed effects: observed\_otus ~ diab

|             | Value    | Std.Error | DF | t-value  | p-value |
|-------------|----------|-----------|----|----------|---------|
| (Intercept) | 463.0000 | 43.22408  | 16 | 10.71162 | 0.000   |
| diaby       | 8.6875   | 61.12808  | 14 | 0.14212  | 0.889   |

Correlation:

(Intr)

diaby -0.707

Standardized Within-Group Residuals:

| Min         | Q1          | Med         | Q3         | Max        |
|-------------|-------------|-------------|------------|------------|
| -0.85536882 | -0.34326499 | -0.06487676 | 0.31265093 | 1.01254874 |

Number of Observations: 32

Number of Groups:

mother swab %in% mother

16 32

> anova(model, test="F")

|             | numDF | denDF | F-value  | p-value |
|-------------|-------|-------|----------|---------|
| (Intercept) | 1     | 16    | 233.8037 | <.0001  |
| diab        | 1     | 14    | 0.0202   | 0.889   |

> plot(model)

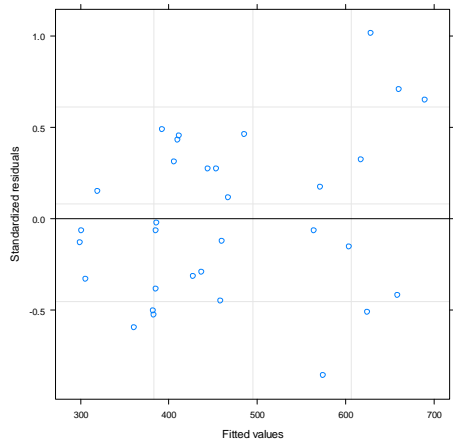

### Supplementary information 3.

R scripts and outputs of NMDS ordination and PERMANOVA (function *adonis* in R-program) analyses based on the relative abundance of OTUs. A: All OTUs. B: Lactobacillus OTUs. Degrees of freedom, F and p values are in bold.

- A. NMDS ordination of the microbiomes of control and diabetic samples. N = 8 (16 microbiomes based on swab type duplicates).

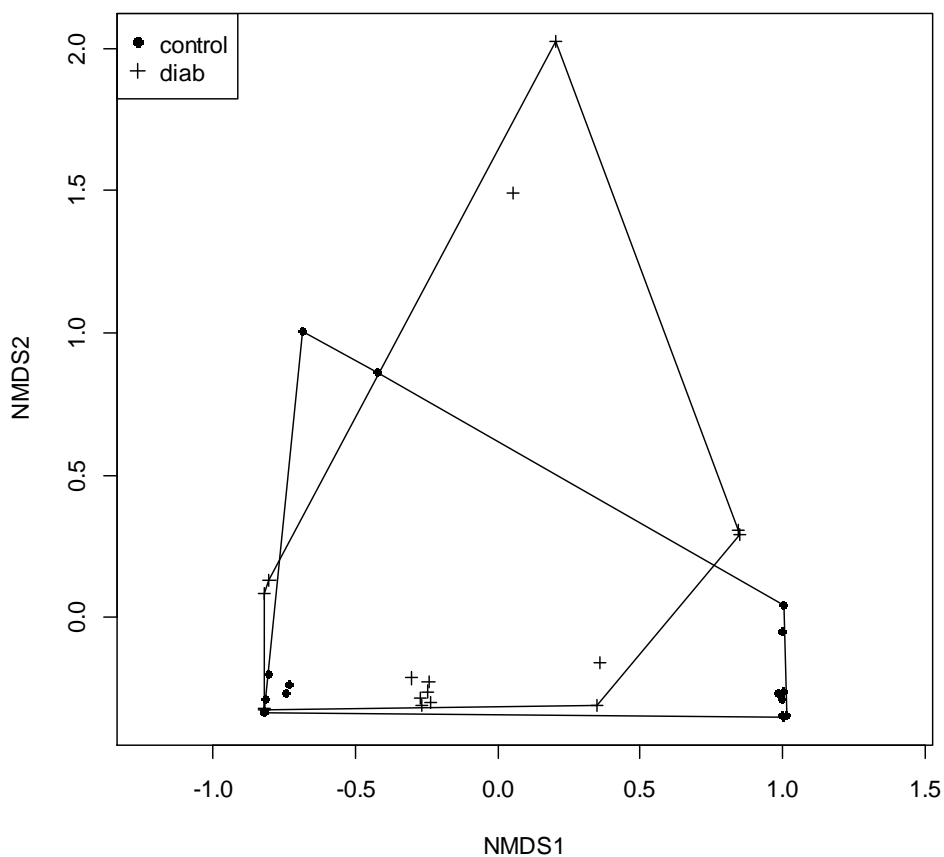

```
> attach(aineisto)
```

```
> diss<-vegdist(aineisto[,4:187])
```

```
> model<-adonis(diss~Treatment, strata=Swab, data=aineisto, permutations=9999)
```

```
> model
```

Call:

```
adonis(formula = diss ~ Treatment, data = aineisto, permutations = 9999, strata = Swab)
```

Blocks: strata

Permutation: free

Number of permutations: 9999

Terms added sequentially (first to last)

|           | Df        | SumsOfSqs | MeanSqs | F.Model       | R2      | Pr(>F)        |
|-----------|-----------|-----------|---------|---------------|---------|---------------|
| Treatment | <b>1</b>  | 0.2739    | 0.27386 | <b>1.2735</b> | 0.04072 | <b>0.2615</b> |
| Residuals | <b>30</b> | 6.4513    | 0.21504 |               | 0.95928 |               |
| Total     | 31        | 6.7251    |         | 1.00000       |         |               |

#### B. PERMANOVA and NMDS ordination of *Lactobacillus* OTUs based on their relative abundances

```
> diss <- vegdist(aineisto[,4:17])
```

```
> mod <- adonis(diss ~ Treatment, strata=Swab, data=aineisto, permutations=9999)
```

```
> mod
```

Call:

```
adonis(formula = diss ~ Treatment, data = aineisto, permutations = 9999, strata = Swab)
```

Blocks: strata

Permutation: free

Number of permutations: 9999

Terms added sequentially (first to last)

|           | Df        | SumsOfSqs | MeanSqs | F.Model       | R2      | Pr(>F)        |
|-----------|-----------|-----------|---------|---------------|---------|---------------|
| Treatment | <b>1</b>  | 0.2489    | 0.24894 | <b>1.3046</b> | 0.04167 | <b>0.2592</b> |
| Residuals | <b>30</b> | 5.7247    | 0.19082 |               | 0.95833 |               |



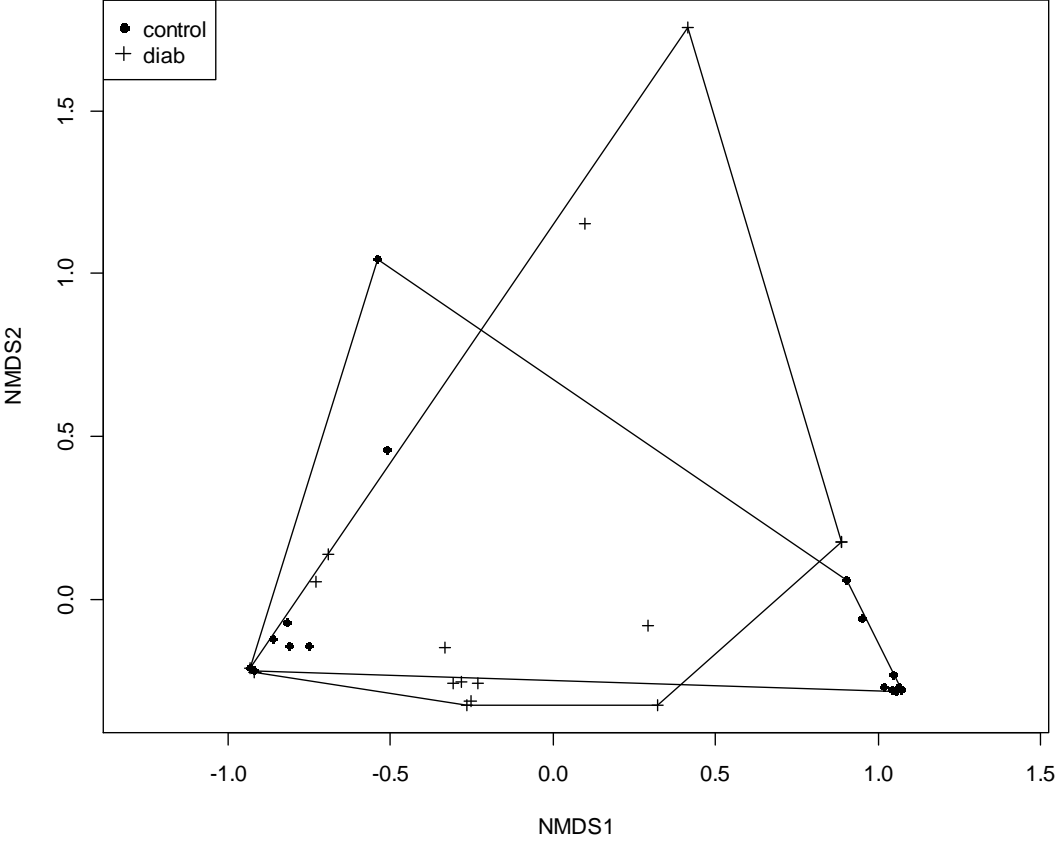

## Supplementary information 4.

Twenty most abundant OTUs in the vaginal microbiomes of mothers who have not delivered a child/children with type 1 diabetes (Control) and mothers who have at least one child with type 1 diabetes (Diabetic).

| Control                                                                                                                        | %     | SD    | Diabetic                                                                                                                       | %     | SD    |
|--------------------------------------------------------------------------------------------------------------------------------|-------|-------|--------------------------------------------------------------------------------------------------------------------------------|-------|-------|
| Firmicutes;Bacilli;Lactobacillales;Lactobacillaceae;Lactobacillus;Other                                                        | 0.468 | 0.379 | Firmicutes;Bacilli;Lactobacillales;Lactobacillaceae;Lactobacillus;OTU199 NN=Lactobacillus_johnsonii_HE573915 D=94.9            | 0.416 | 0.288 |
| Firmicutes;Bacilli;Lactobacillales;Lactobacillaceae;Lactobacillus;OTU199 NN=Lactobacillus_johnsonii_HE573915 D=94.9            | 0.322 | 0.373 | Firmicutes;Bacilli;Lactobacillales;Lactobacillaceae;Lactobacillus;Other                                                        | 0.281 | 0.185 |
| Firmicutes;Bacilli;Lactobacillales;Streptococcaceae;Streptococcus;Streptococcus_agalactiae                                     | 0.064 | 0.147 | Firmicutes;Bacilli;Lactobacillales;Streptococcaceae;Streptococcus;Streptococcus_agalactiae                                     | 0.048 | 0.128 |
| Actinobacteria;Actinobacteria;Coriobacteriales;Coriobacteriaceae;Olsenella;Other                                               | 0.022 | 0.022 | Actinobacteria;Actinobacteria;Coriobacteriales;Coriobacteriaceae;Olsenella;Other                                               | 0.030 | 0.080 |
| Firmicutes;Bacilli;Lactobacillales;Lactobacillaceae;Lactobacillus;OTU1294 NN=Lactobacillus_gasseri_JQ805634 D=96.7             | 0.017 | 0.045 | Firmicutes;Bacilli;Lactobacillales;Lactobacillaceae;Lactobacillus;Lactobacillus_gasseri                                        | 0.024 | 0.037 |
| Bacteroidetes;Bacteroidia;Bacteroidales;Prevotellaceae;Prevotella;Prevotella_bivia                                             | 0.016 | 0.018 | Bacteroidetes;Bacteroidia;Bacteroidales;Prevotellaceae;Prevotella;Prevotella_timonensis                                        | 0.023 | 0.061 |
| Firmicutes;Bacilli;Lactobacillales;Lactobacillaceae;Lactobacillus;OTU1032 NN=Lactobacillus_johnsonii_HE573915 D=95.8           | 0.013 | 0.034 | Firmicutes;Bacilli;Lactobacillales;Lactobacillaceae;Lactobacillus;Lactobacillus_johnsonii                                      | 0.020 | 0.026 |
| Firmicutes;Bacilli;Lactobacillales;Lactobacillaceae;Lactobacillus;Lactobacillus_gasseri                                        | 0.012 | 0.033 | Bacteroidetes;Bacteroidia;Bacteroidales;Prevotellaceae;Prevotella;Prevotella_bivia                                             | 0.017 | 0.049 |
| Bacteroidetes;Bacteroidia;Bacteroidales;Prevotellaceae;Prevotella;Prevotella_timonensis                                        | 0.010 | 0.023 | Fusobacteria;Fusobacteriia;Fusobacteriales;Fusobacteriaceae;Fusobacterium;OTU23 NN=Fusobacterium_periodonticum_AB910749 D=96.5 | 0.014 | 0.042 |
| Firmicutes;Bacilli;Lactobacillales;Lactobacillaceae;Lactobacillus;Lactobacillus_johnsonii                                      | 0.005 | 0.005 | Bacteroidetes;Bacteroidia;Bacteroidales;Porphyromonadaceae;Other;Other                                                         | 0.012 | 0.040 |
| Firmicutes;Bacilli;Lactobacillales;Aerococcaceae;Aerococcus;Aerococcus_viridans                                                | 0.005 | 0.014 | Firmicutes;Bacilli;Lactobacillales;Lactobacillaceae;Lactobacillus;OTU1294 NN=Lactobacillus_gasseri_JQ805634 D=96.7             | 0.011 | 0.024 |
| Fusobacteria;Fusobacteriia;Fusobacteriales;Fusobacteriaceae;Fusobacterium;OTU23 NN=Fusobacterium_periodonticum_AB910749 D=96.5 | 0.005 | 0.006 | Firmicutes;Bacilli;Lactobacillales;Lactobacillaceae;Lactobacillus;OTU1032 NN=Lactobacillus_johnsonii_HE573915 D=95.8           | 0.009 | 0.011 |
| Fusobacteria;Fusobacteriia;Fusobacteriales;Leptotrichiaceae;Sneathia;Sneathia_amnionii                                         | 0.005 | 0.005 | Firmicutes;Bacilli;Lactobacillales;Lactobacillaceae;Lactobacillus;Lactobacillus_oris                                           | 0.008 | 0.020 |

|                                                                                                                         |              |              |                                                                                                                         |              |              |
|-------------------------------------------------------------------------------------------------------------------------|--------------|--------------|-------------------------------------------------------------------------------------------------------------------------|--------------|--------------|
| Bacteroidetes;Bacteroidia;Bacteroidales;Porphyromonadaceae;Other;Other                                                  | 0.004        | 0.009        | Fusobacteria;Fusobacteriia;Fusobacteriales;Fusobacteriaceae;Fusobacterium;Other                                         | 0.007        | 0.023        |
| Firmicutes;Negativicutes;Selenomonadales;Veillonellaceae;Megasphaera;OTU301 NN=Megasphaera_elsdenii_DQ146765 D=93.8     | 0.004        | 0.004        | Tenericutes;Mollicutes;Mycoplasmatales;Mycoplasmataceae;Mycoplasma;Mycoplasma_hominis                                   | 0.006        | 0.018        |
| Unclassified;Other;Other;Other;Other;Other                                                                              | 0.003        | 0.009        | Firmicutes;Negativicutes;Selenomonadales;Veillonellaceae;Dialister;OTU1084 NN=Dialister_succinatiphilus_AB370249 D=93.2 | 0.006        | 0.019        |
| Firmicutes;Bacilli;Lactobacillales;Lactobacillaceae;Lactobacillus;Lactobacillus_oris                                    | 0.003        | 0.008        | Unclassified;Other;Other;Other;Other;Other                                                                              | 0.005        | 0.004        |
| Firmicutes;Negativicutes;Selenomonadales;Veillonellaceae;Dialister;OTU1084 NN=Dialister_succinatiphilus_AB370249 D=93.2 | 0.003        | 0.005        | Firmicutes;Bacilli;Lactobacillales;Streptococcaceae;Streptococcus;Streptococcus_anginosus                               | 0.004        | 0.010        |
| Fusobacteria;Fusobacteriia;Fusobacteriales;Fusobacteriaceae;Fusobacterium;Other                                         | 0.002        | 0.006        | Bacteroidetes;Bacteroidia;Bacteroidales;Other;Other;Other                                                               | 0.003        | 0.009        |
| <b>Sum</b>                                                                                                              | <b>0.982</b> | <b>1.143</b> | <b>Sum</b>                                                                                                              | <b>0.944</b> | <b>1.073</b> |
